# Supplementary material for: Investigating pressure-driven semiconductor-to-metal transition in lead-free perovskites AlGeX 3 (X = F, Cl, and Br): insights from first-principles calculations
Source: Royal Society of Chemistry journal article supplement (doi:10.1039/d4ma00611a), 2024-01-01
Supplement: d4ma00611a1.pdf [file d4ma00611a1.pdf]

## Supplementary Information

### Investigating Pressure-Driven Semiconductor-to-Metal Transition in Lead-Free Perovskites $\text{AlGeX}_3$ (X= F, Cl, and Br): Insights from First-Principles Calculations

Md. Amran Sarker <sup>1,2</sup>, Md Mehedi Hasan <sup>2</sup>, Md. Rafiqul Islam <sup>3</sup>, Md. Rabbi Talukder <sup>2</sup>, Md. Rasidul Islam <sup>4</sup>, Ahmed Sharif <sup>1</sup>

<sup>1</sup>Department of Materials and Metallurgical Engineering, Bangladesh University of Engineering & Technology (BUET), Dhaka 1000, Bangladesh.

<sup>2</sup>Department of Materials Science and Engineering, Khulna University of Engineering & Technology (KUET), Khulna 9203, Bangladesh.

<sup>3</sup>Department of Electrical and Electronic Engineering, Khulna University of Engineering & Technology (KUET), Khulna 9203, Bangladesh.

<sup>4</sup>Department of Electrical and Electronic Engineering, Bangamata Sheikh Fojilatunnesa Mujib Science & Technology University, Jamalpur-2012, Bangladesh.

\*Corresponding Author's Email:

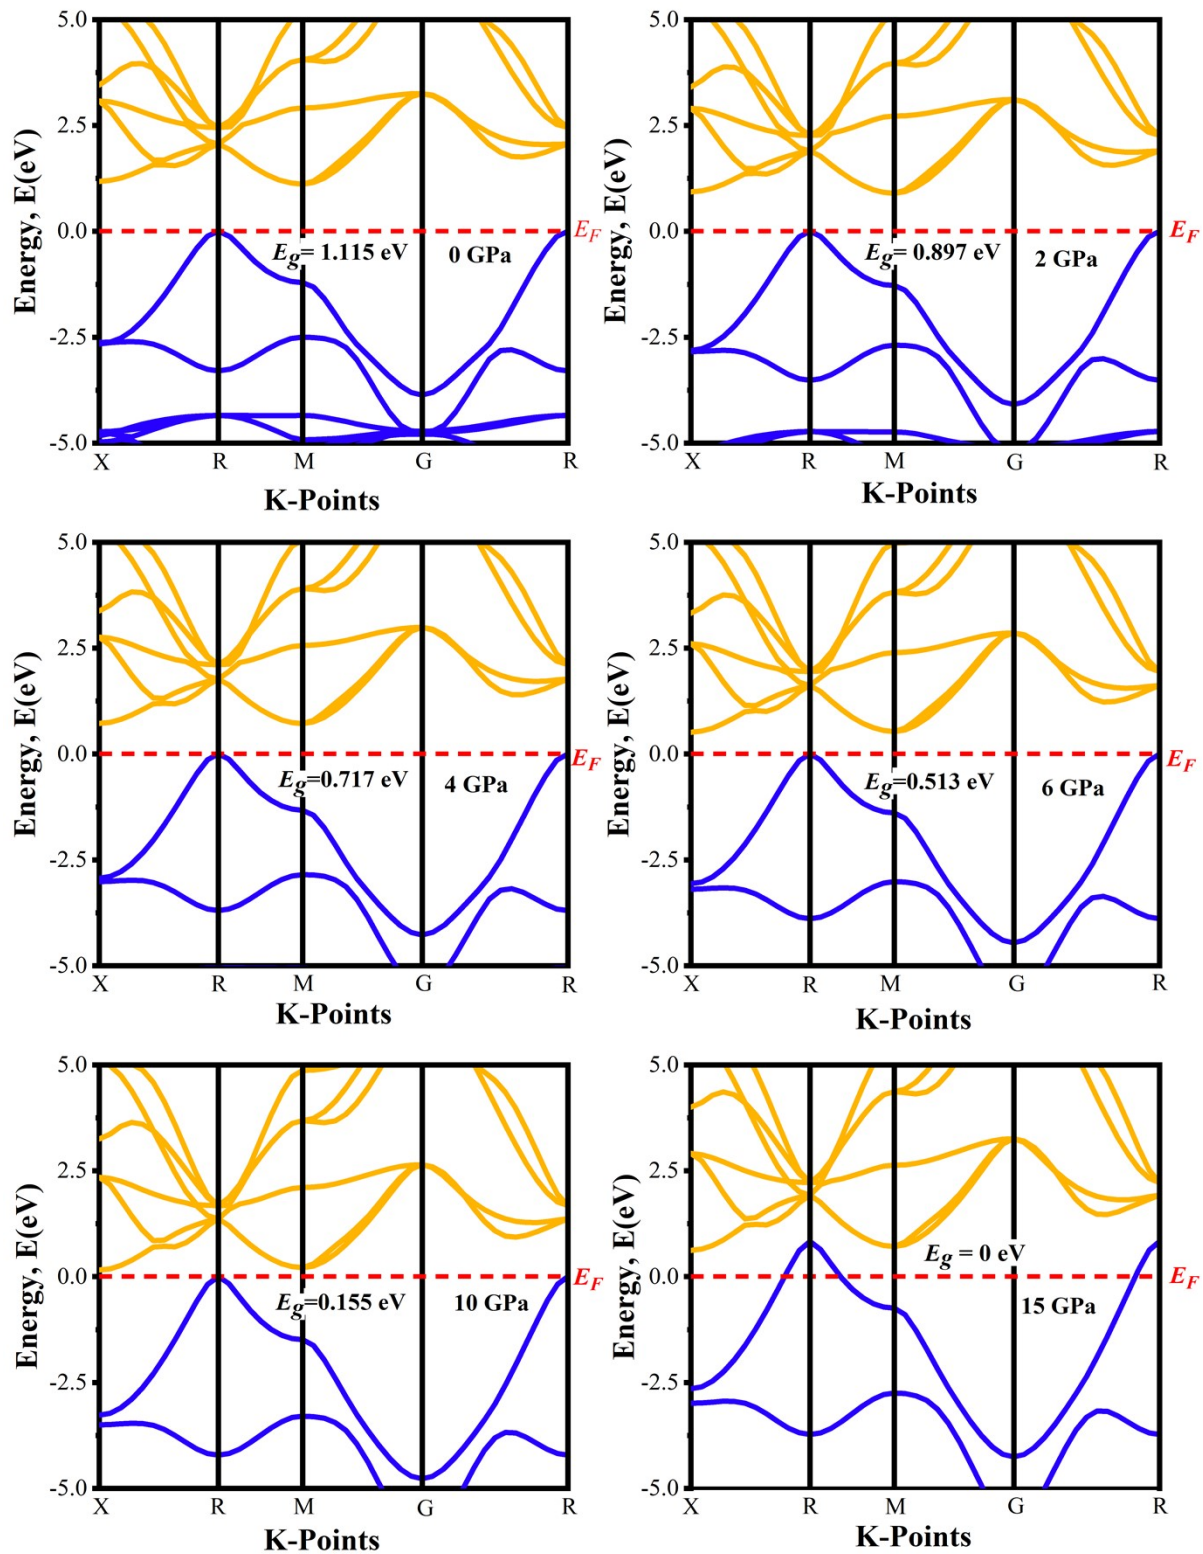

Fig. S1 Band structure of AlGeF<sub>3</sub> under hydrostatic pressure.

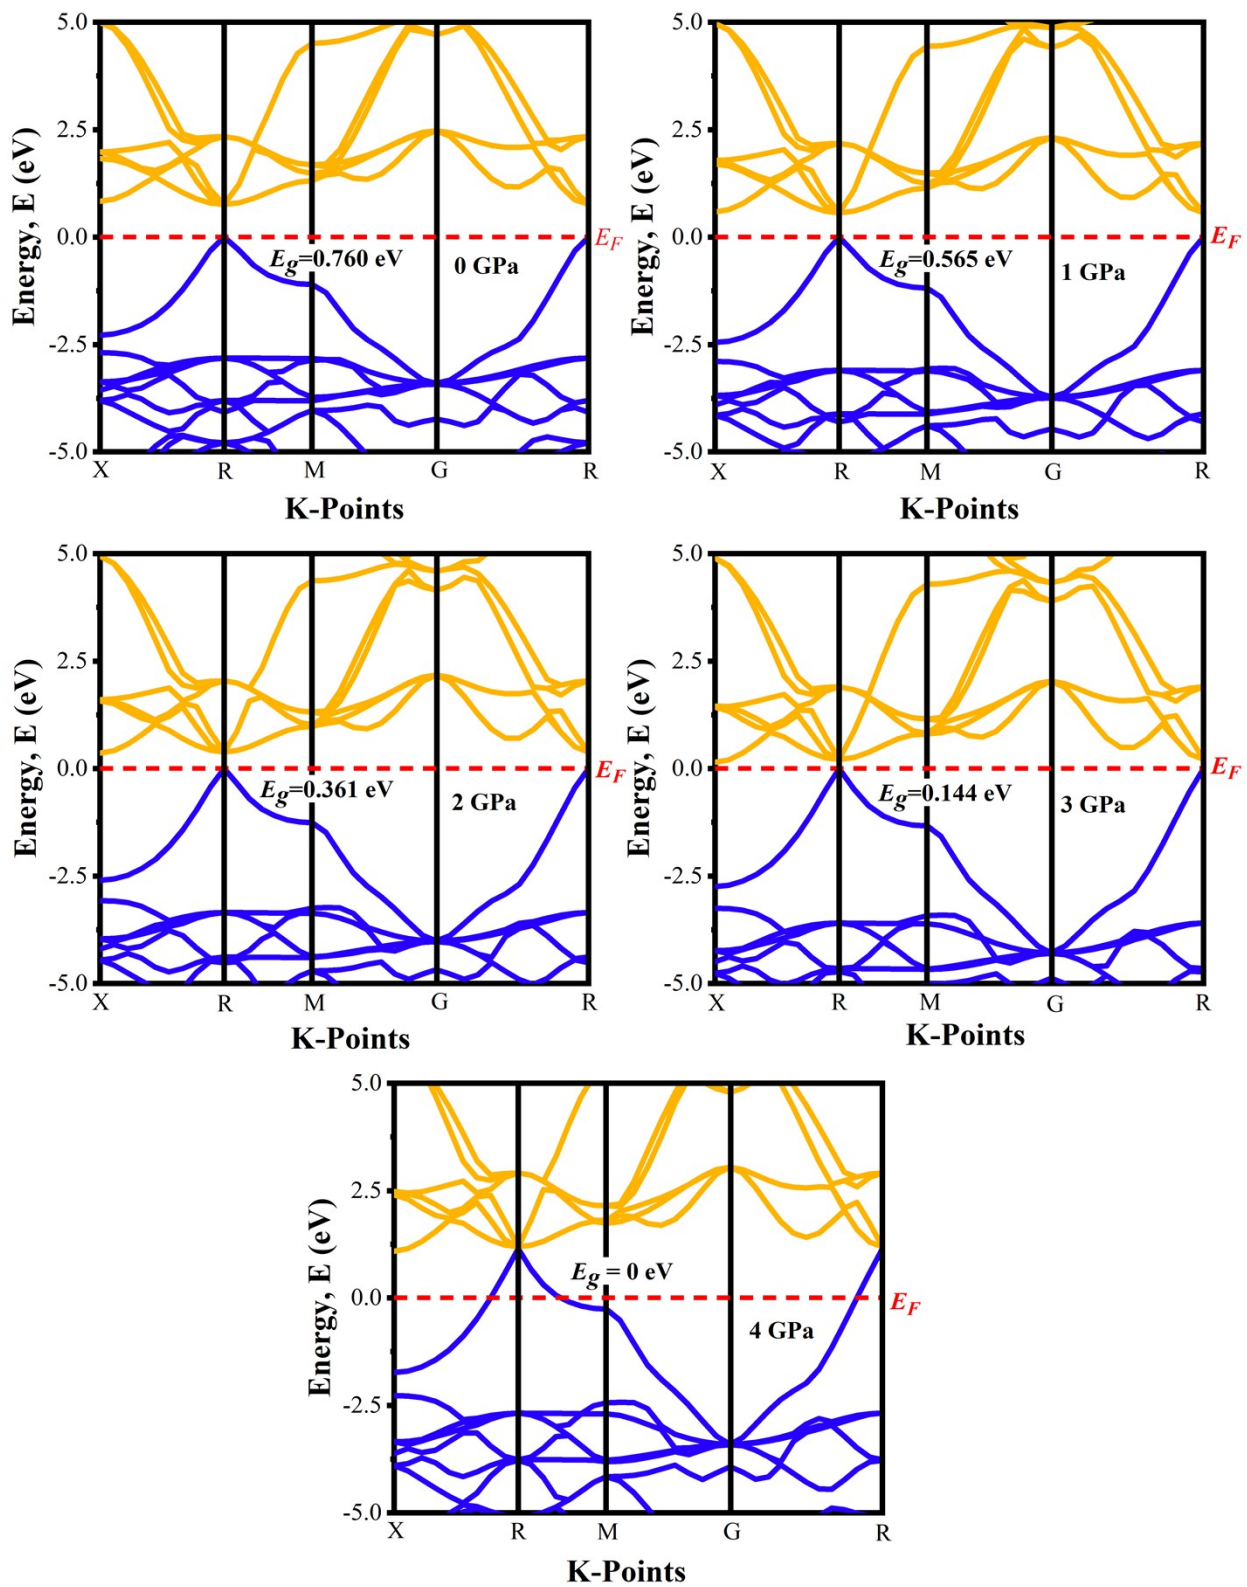

Fig. S2 Band structure of AlGeCl<sub>3</sub> under hydrostatic pressure.

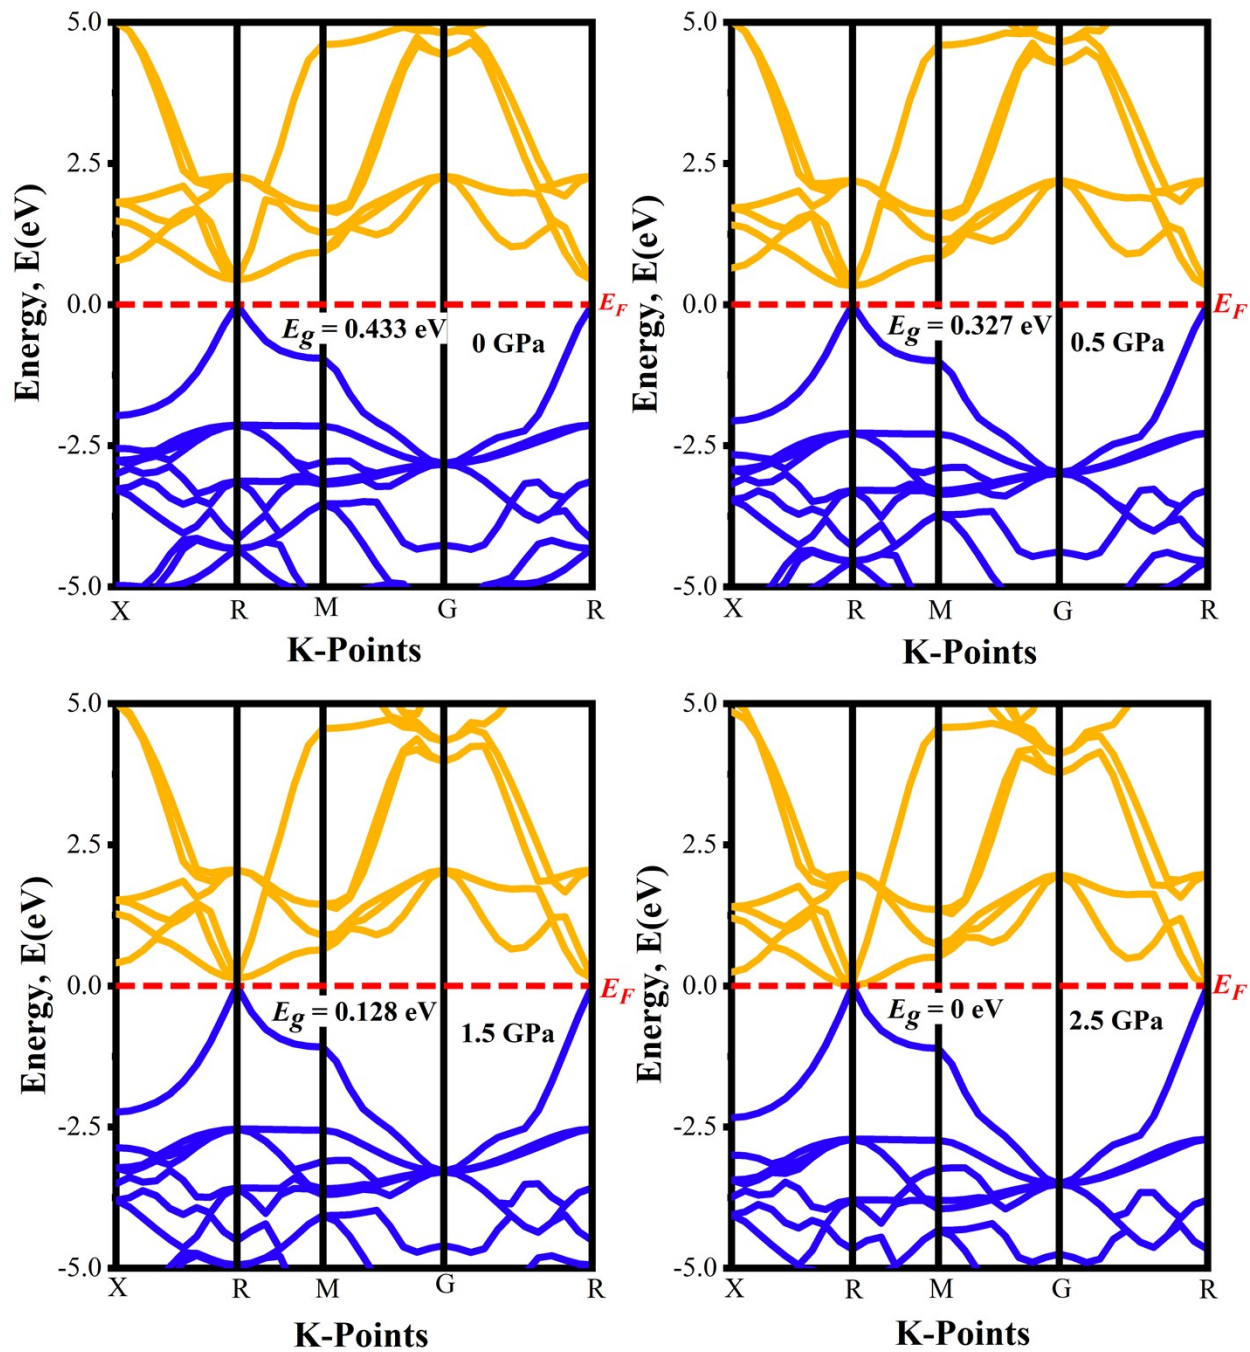

Fig. S3 Band structure of AlGeBr<sub>3</sub> under hydrostatic pressure.

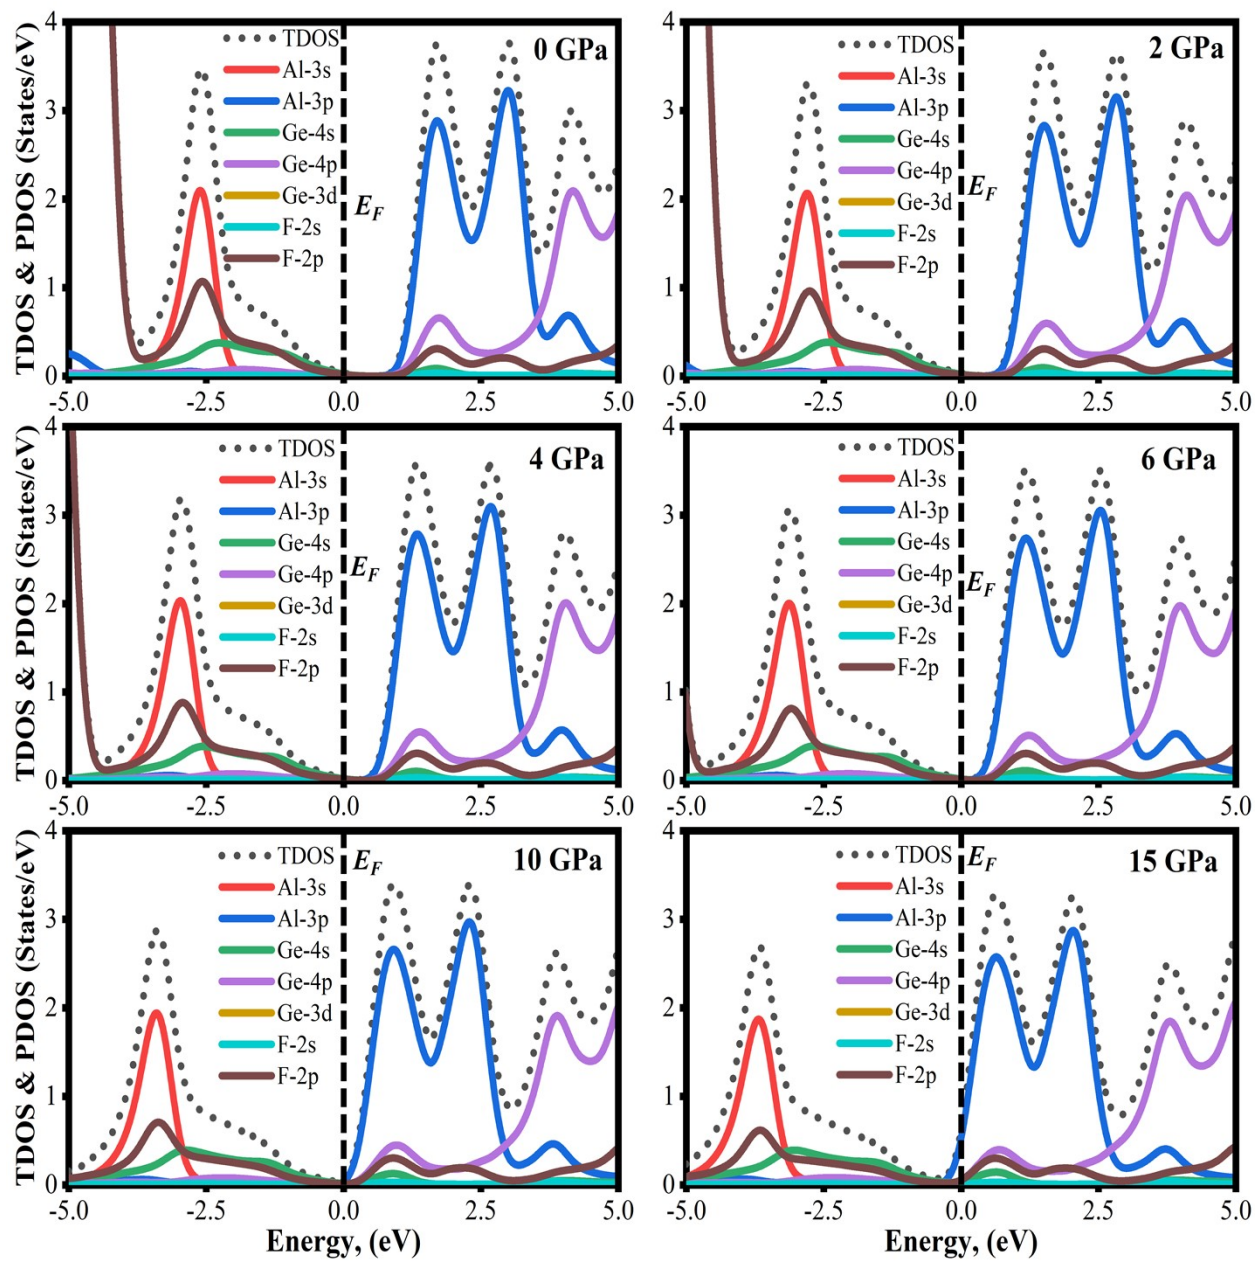

Fig. S4 The calculated TDOS and PDOS of cubic AlGeF<sub>3</sub> perovskites under pressure.

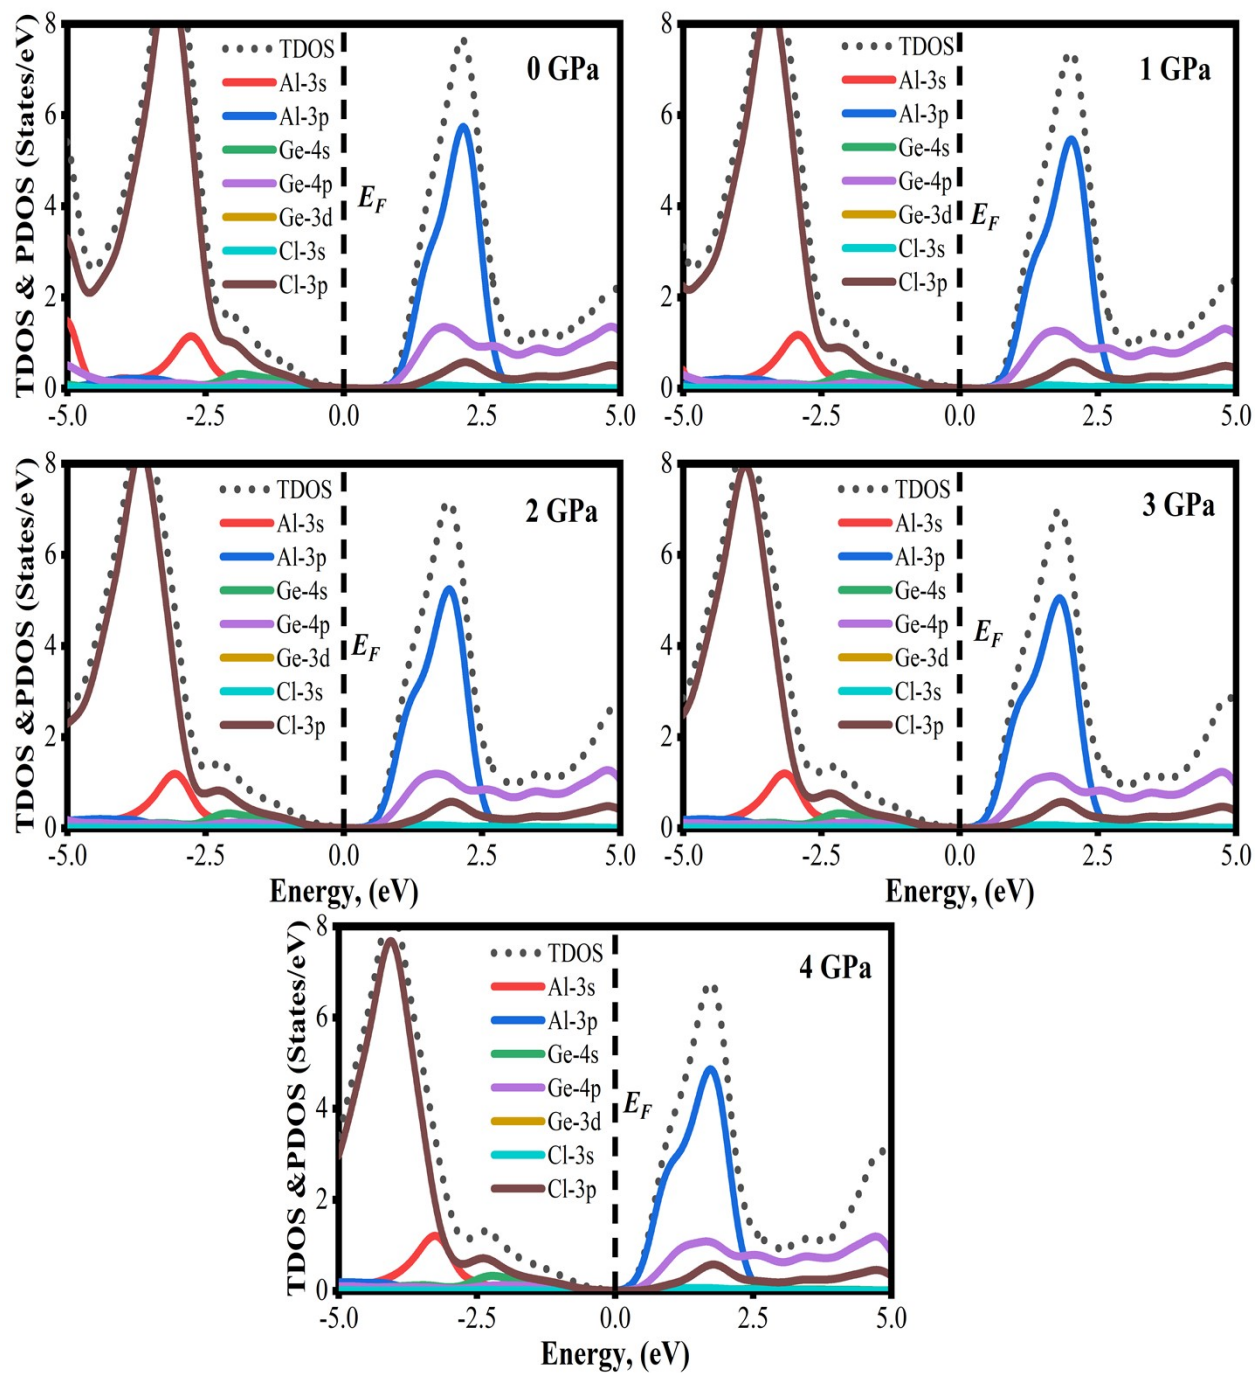

Fig. S5 The calculated TDOS and PDOS of cubic AlGeCl<sub>3</sub> perovskites under pressures.

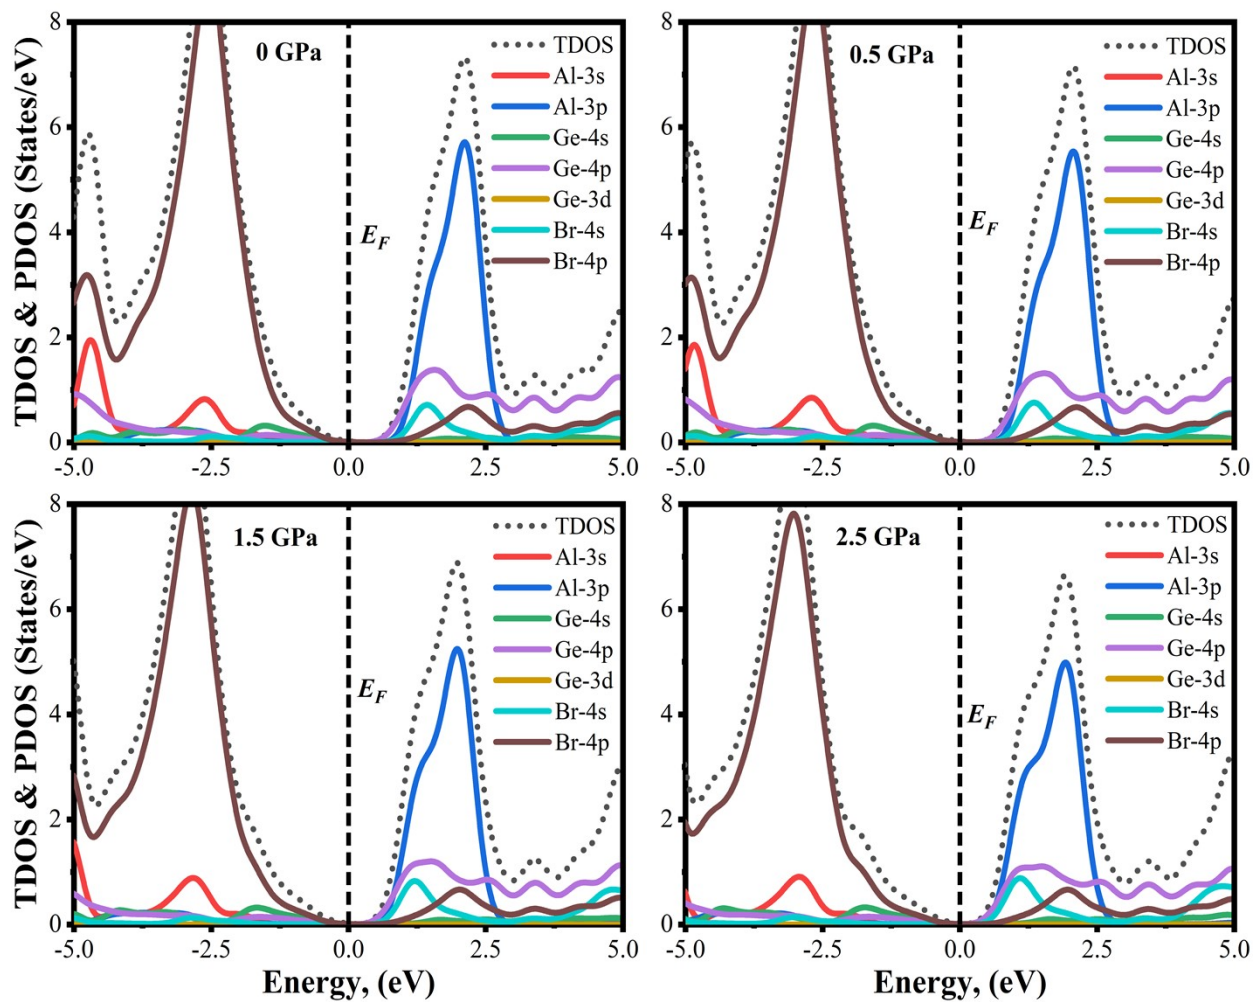

Fig. S6 The calculated TDOS and PDOS of cubic  $\text{AlGeBr}_3$  perovskites under pressures.

Table S1: The calculated lattice parameters (a), cell volume (V), formation energy ( $\Delta H_f$ ), and band gap ( $E_g$ ) of  $\text{AlGeX}_3$  (X = F, Cl, and Br) at different pressures.

(a)  $\text{AlGeF}_3$

| Pressure (GPa) | a(Å)  | V(Å <sup>3</sup> ) | $\Delta H_f$ (eV/atom) | $E_g$ (eV) |
|----------------|-------|--------------------|------------------------|------------|
| 0              | 4.456 | 88.48              | -4.455                 | 1.115      |
| 2              | 4.401 | 85.24              | -4.308                 | 0.897      |
| 4              | 4.355 | 82.61              | -4.108                 | 0.717      |
| 6              | 4.315 | 80.34              | -3.908                 | 0.513      |
| 10             | 4.245 | 76.48              | -3.508                 | 0.155      |
| 15             | 4.173 | 72.69              | -2.908                 | 0          |

(b)  $\text{AlGeCl}_3$

| Pressure (GPa) | a(Å)  | V(Å <sup>3</sup> ) | $\Delta E_f$ (eV/atom) | $E_g$ (eV) |
|----------------|-------|--------------------|------------------------|------------|
| 0              | 5.215 | 141.83             | -3.370                 | 0.760      |
| 1              | 5.156 | 137.10             | -3.295                 | 0.565      |
| 2              | 5.106 | 133.16             | -3.095                 | 0.361      |
| 3              | 5.061 | 129.61             | -2.895                 | 0.144      |
| 4              | 5.019 | 126.41             | -2.695                 | 0          |

(c)  $\text{AlGeBr}_3$

| Pressure (GPa) | a(Å)  | V(Å <sup>3</sup> ) | $\Delta E_f$ (eV/atom) | $E_g$ (eV) |
|----------------|-------|--------------------|------------------------|------------|
| 0              | 5.471 | 163.72             | -3.045                 | 0.433      |
| 0.5            | 5.434 | 160.44             | -2.968                 | 0.327      |
| 1.5            | 5.370 | 154.80             | -2.768                 | 0.128      |
| 2.5            | 5.313 | 149.99             | -2.568                 | 0          |



Table S2: Variation in bond length of cubic  $\text{AlGeX}_3$  ( $X = \text{F}, \text{Cl}, \text{and Br}$ ) at different pressure

| $\text{AlGeF}_3$ |       |                 | $\text{AlGeCl}_3$ |       |                 | $\text{AlGeBr}_3$ |       |                 |
|------------------|-------|-----------------|-------------------|-------|-----------------|-------------------|-------|-----------------|
| Pressure (GPa)   |       | Bond length (Å) | Pressure (GPa)    |       | Bond length (Å) | Pressure (GPa)    |       | Bond length (Å) |
| 0GPa             | Ge-F  | 2.22797         | 0GPa              | Ge-Cl | 2.60752         | 0GPa              | Ge-Br | 2.73528         |
|                  | Al-F  | 3.15083         |                   | Al-Cl | 3.68759         |                   | Al-Br | 3.86827         |
|                  | Al-Ge | 3.85897         |                   | Al-Ge | 4.51636         |                   | Al-Ge | 4.73764         |
| 2GPa             | Ge-F  | 2.20052         | 1GPa              | Ge-Cl | 2.57817         | 0.5GPa            | Ge-Br | 2.71692         |
|                  | Al-F  | 3.11200         |                   | Al-Cl | 3.64608         |                   | Al-Br | 3.84231         |
|                  | Al-Ge | 3.81141         |                   | Al-Ge | 4.46552         |                   | Al-Ge | 4.70585         |
| 4GPa             | Ge-F  | 2.17765         | 2GPa              | Ge-Cl | 2.55327         | 1.5GPa            | Ge-Br | 2.68466         |
|                  | Al-F  | 3.07967         |                   | Al-Cl | 3.61087         |                   | Al-Br | 3.79668         |
|                  | Al-Ge | 3.77180         |                   | Al-Ge | 4.42239         |                   | Al-Ge | 4.64997         |
| 6GPa             | Ge-F  | 2.15747         | 3GPa              | Ge-Cl | 2.53033         | 2.5GPa            | Ge-Br | 2.65663         |
|                  | Al-F  | 3.05113         |                   | Al-Cl | 3.57843         |                   | Al-Br | 3.75704         |
|                  | Al-Ge | 3.73686         |                   | Al-Ge | 4.38266         |                   | Al-Ge | 4.60141         |
| 10GPa            | Ge-F  | 2.12233         | 4GPa              | Ge-Cl | 2.50934         |                   |       |                 |
|                  | Al-F  | 3.00142         |                   | Al-Cl | 3.54874         |                   |       |                 |
|                  | Al-Ge | 3.67598         |                   | Al-Ge | 4.34630         |                   |       |                 |
| 15GPa            | Ge-F  | 2.08669         |                   |       |                 |                   |       |                 |
|                  | Al-F  | 2.95103         |                   |       |                 |                   |       |                 |
|                  | Al-Ge | 3.61426         |                   |       |                 |                   |       |                 |

Table S3(a): The calculated elastic constants, bulk modulus (B), shear modulus (G), Young's modulus (E), Pugh's ration, Poisson's ratio ( $\nu$ ), hardness ( $H_v$ ), and machinability index ( $\mu_M$ ) of  $\text{AlGeF}_3$  under hydrostatic pressure.

| Pressure (GPa) | $C_{11}$ | $C_{12}$ | $C_{44}$ | $C_{12}-C_{44}$ | B (Gpa) | G (Gpa) | E     | B/G  | $\nu$  | $H_v$  | $\mu_M$ |
|----------------|----------|----------|----------|-----------------|---------|---------|-------|------|--------|--------|---------|
| 0              | 72.41    | 26.32    | 9.17     | 17.15           | 41.68   | 13.40   | 36.31 | 3.11 | 0.3548 | 1.5907 | 4.5436  |
| 2              | 84.94    | 25.48    | 4.48     | 21.00           | 45.30   | 10.68   | 29.72 | 4.24 | 0.3907 | 0.9525 | 10.1113 |
| 4              | 101.82   | 32.64    | 5.04     | 27.60           | 55.70   | 12.25   | 34.25 | 4.55 | 0.3975 | 0.9696 | 11.0523 |
| 6              | 122.13   | 38.75    | 8.05     | 30.70           | 66.54   | 16.70   | 46.22 | 3.99 | 0.3842 | 1.4017 | 8.2661  |
| 10             | 152.74   | 50.38    | 7.03     | 43.35           | 84.50   | 17.71   | 49.66 | 4.77 | 0.4021 | 1.1911 | 12.0201 |
| 15             | 174.11   | 61.93    | 8.09     | 53.84           | 99.32   | 19.79   | 55.68 | 5.02 | 0.4066 | 1.2166 | 12.2774 |

Table S3(b): Changes in anisotropy of cubic  $\text{AlGeF}_3$  under hydrostatic pressure.

| Pressure (GPa) | $A_1$  | $A_2$  | $A_3$  | A      | $A_G$  | $A_B$ | $A^U$  | $A^{eq}$ |
|----------------|--------|--------|--------|--------|--------|-------|--------|----------|
| 0              | 0.3981 | 0.3981 | 0.3981 | 0.3981 | 0.1970 | 0     | 1.0924 | 2.5123   |
| 2              | 0.1507 | 0.1507 | 0.1507 | 0.1507 | 0.7296 | 0     | 5.7428 | 6.6350   |
| 4              | 0.1456 | 0.1456 | 0.1456 | 0.1456 | 0.7513 | 0     | 6.0168 | 6.8684   |
| 6              | 0.1931 | 0.1931 | 0.1931 | 0.1931 | 0.5761 | 0     | 4.0462 | 5.1788   |
| 10             | 0.1374 | 0.1374 | 0.1374 | 0.1374 | 0.7880 | 0     | 6.5010 | 7.2801   |
| 15             | 0.1442 | 0.1442 | 0.1442 | 0.1442 | 0.7574 | 0     | 6.0953 | 6.9352   |

Table S4(a): The calculated elastic constants, bulk modulus (B), shear modulus (G), Young's modulus (E), Pugh's ration, Poisson's ratio ( $\nu$ ), hardness ( $H_v$ ), and machinability index ( $\mu_M$ ) of  $\text{AlGeCl}_3$  under hydrostatic pressure.

| Pressure (GPa) | $C_{11}$ | $C_{12}$ | $C_{44}$ | $C_{12}-C_{44}$ | B (Gpa) | G (Gpa) | Y     | B/G  | $\nu$  | $H_v$  | $\mu_M$ |
|----------------|----------|----------|----------|-----------------|---------|---------|-------|------|--------|--------|---------|
| 0              | 60.47    | 11.78    | 6.15     | 5.63            | 28.01   | 11.10   | 29.41 | 2.52 | 0.3250 | 1.7641 | 4.5581  |
| 1              | 70.28    | 13.91    | 6.16     | 7.75            | 32.70   | 11.97   | 32.00 | 2.73 | 0.3369 | 1.7009 | 5.3084  |
| 2              | 77.04    | 13.46    | 6.18     | 7.28            | 34.65   | 12.77   | 34.13 | 2.71 | 0.3359 | 1.7957 | 5.6070  |
| 3              | 83.50    | 12.67    | 6.19     | 6.48            | 36.28   | 13.56   | 36.17 | 2.68 | 0.3338 | 1.9031 | 5.8610  |
| 4              | 99.11    | 21.11    | 6.21     | 14.9            | 47.11   | 14.34   | 39.06 | 3.29 | 0.3618 | 1.5681 | 7.5864  |

Table S4(b): Changes in anisotropy of cubic  $\text{AlGeCl}_3$  under hydrostatic pressure.

| Pressure (GPa) | $A_1$  | $A_2$  | $A_3$  | A      | $A_G$  | $A_B$ | $A^U$  | $A^{eq}$ |
|----------------|--------|--------|--------|--------|--------|-------|--------|----------|
| 0              | 0.2524 | 0.2524 | 0.2524 | 0.2524 | 0.4198 | 0     | 2.6570 | 3.9618   |
| 1              | 0.2187 | 0.2187 | 0.2187 | 0.2187 | 0.5019 | 0     | 3.3504 | 4.5733   |
| 2              | 0.1944 | 0.1944 | 0.1944 | 0.1944 | 0.5720 | 0     | 4.0057 | 5.1436   |
| 3              | 0.1748 | 0.1748 | 0.1748 | 0.1748 | 0.6373 | 0     | 4.6765 | 5.7224   |
| 4              | 0.1593 | 0.1593 | 0.1593 | 0.1593 | 0.6950 | 0     | 5.3259 | 6.2790   |

Table S5(a): The calculated elastic constants, bulk modulus (B), shear modulus (G), Young's modulus (E), Pugh's ration, Poisson's ratio ( $\nu$ ), hardness ( $H_v$ ), and machinability index ( $\mu_M$ ) of  $\text{AlGeBr}_3$  under hydrostatic pressure.

| Pressure (GPa) | $C_{11}$ | $C_{12}$ | $C_{44}$ | $C_{12}-C_{44}$ | B (Gpa) | G (Gpa) | Y     | B/G  | $\nu$  | $H_v$  | $\mu_M$ |
|----------------|----------|----------|----------|-----------------|---------|---------|-------|------|--------|--------|---------|
| 0              | 53.85    | 9.77     | 5.60     | 4.17            | 24.46   | 10.08   | 26.59 | 2.43 | 0.3188 | 1.7242 | 4.3661  |
| 0.5            | 58.32    | 10.09    | 5.71     | 4.38            | 26.16   | 10.65   | 28.12 | 2.46 | 0.3209 | 1.7659 | 4.5822  |
| 1.5            | 67.40    | 11.18    | 5.92     | 5.26            | 29.92   | 11.73   | 31.12 | 2.55 | 0.3267 | 1.8125 | 5.0540  |
| 2.5            | 76.07    | 12.10    | 6.13     | 5.97            | 33.42   | 12.76   | 33.96 | 2.62 | 0.3307 | 1.8678 | 5.4524  |

Table S5(b): Changes in anisotropy of cubic  $\text{AlGeBr}_3$  under hydrostatic pressure.

| Pressure (GPa) | $A_1$  | $A_2$  | $A_3$  | A      | $A_G$  | $A_B$ | $A^U$  | $A^{eq}$ |
|----------------|--------|--------|--------|--------|--------|-------|--------|----------|
| 0              | 0.2542 | 0.2542 | 0.2542 | 0.2542 | 0.4160 | 0     | 2.6260 | 3.9341   |
| 0.5            | 0.2367 | 0.2367 | 0.2367 | 0.2367 | 0.4560 | 0     | 2.9530 | 4.2241   |
| 1.5            | 0.2107 | 0.2107 | 0.2107 | 0.2107 | 0.5237 | 0     | 3.5470 | 4.7451   |
| 2.5            | 0.1915 | 0.1915 | 0.1915 | 0.1915 | 0.5811 | 0     | 4.0958 | 5.2217   |

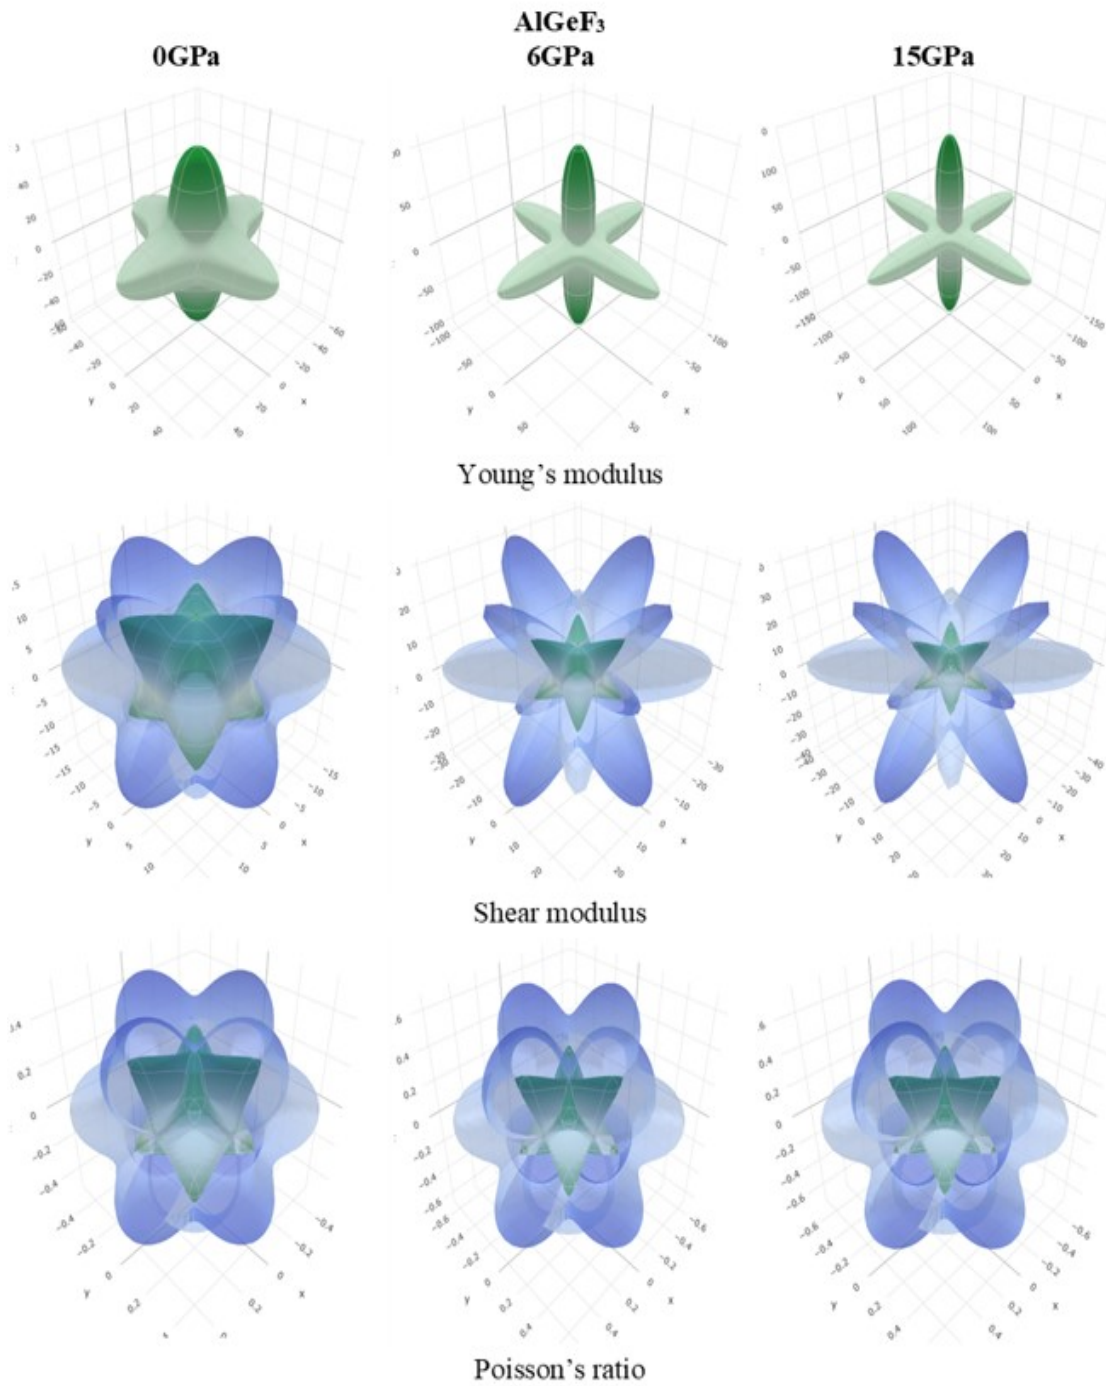

Fig. S7 Anisotropic 3D representation of Young's modulus, shear modulus, and Poisson's ratio of AlGeF<sub>3</sub> at different pressures.

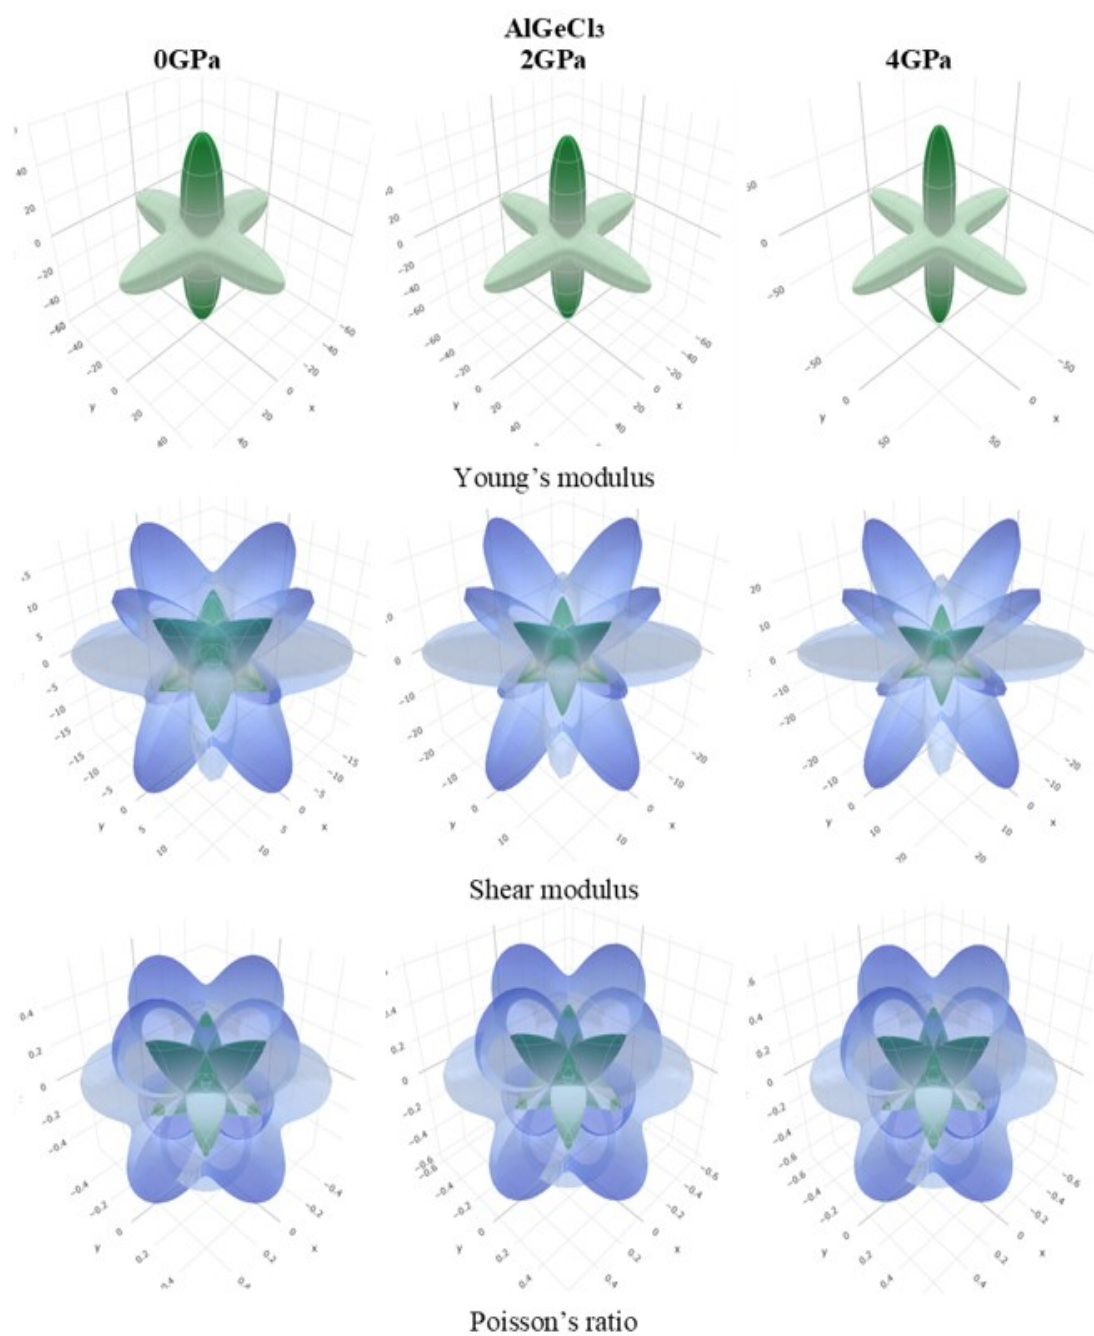

Fig. S8 Anisotropic 3D representation of Young's modulus, shear modulus, and Poisson's ratio of AlGeCl<sub>3</sub> at different pressures.

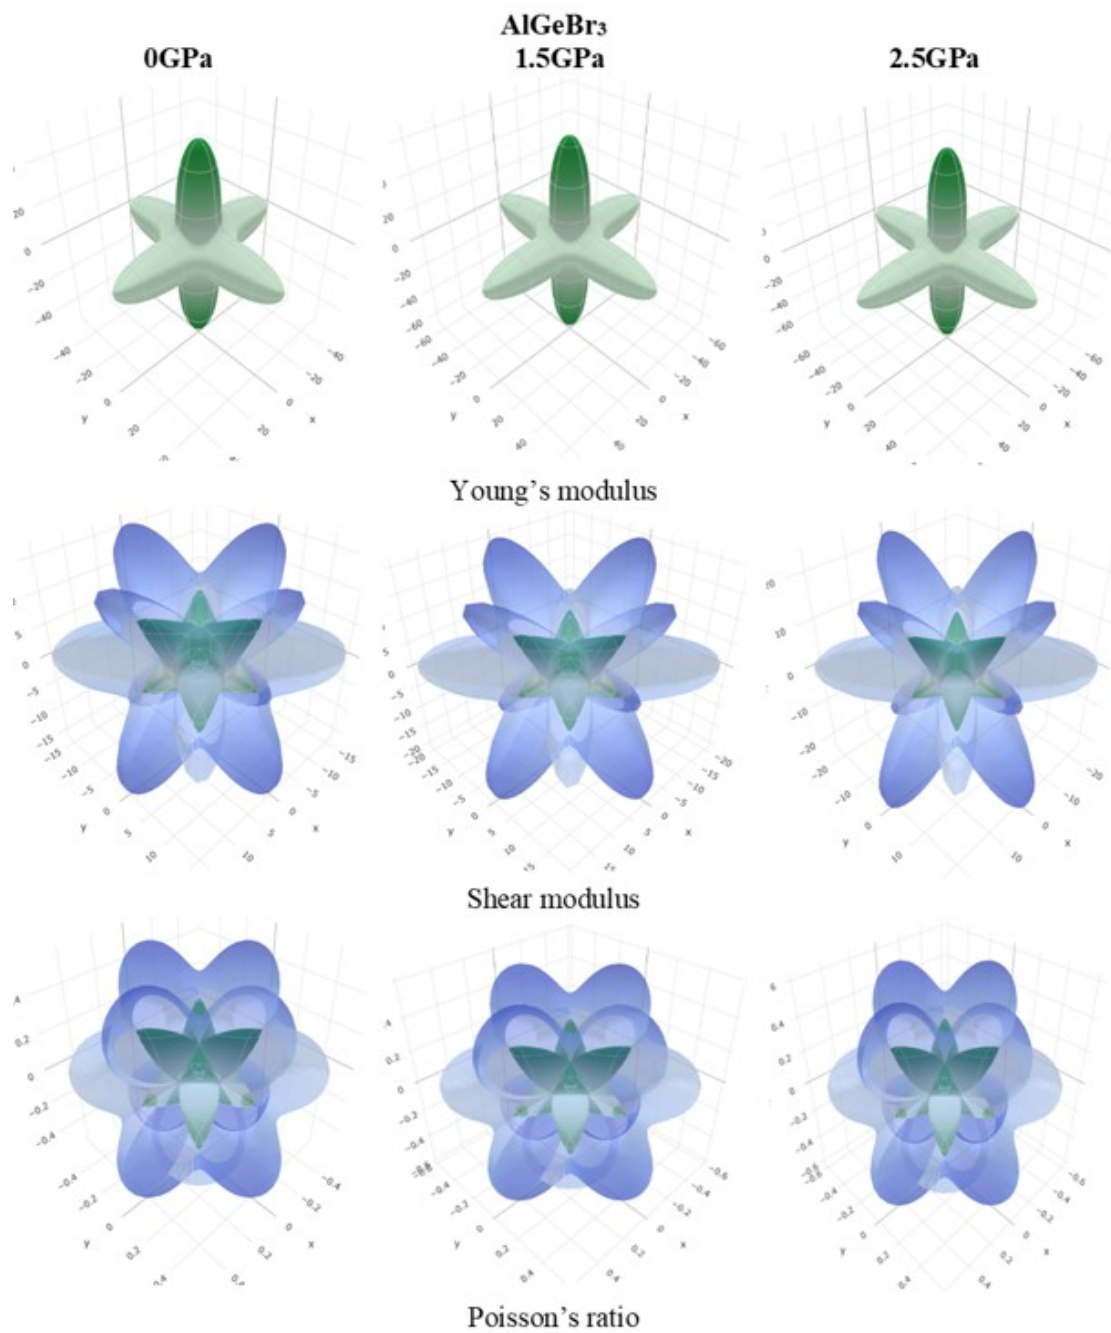

Fig. S9 Anisotropic 3D representation of Young's modulus, shear modulus, and Poisson's ratio of AlGeBr<sub>3</sub> at different pressure.
